# Supplementary figures and images for: Living on a volcano’s edge: genetic isolation of an extremophile terrestrial metazoan
Source: Springer Nature journal article supplement (doi:10.1038/hdy.2013.84), 2013-09-18

Coord. 2

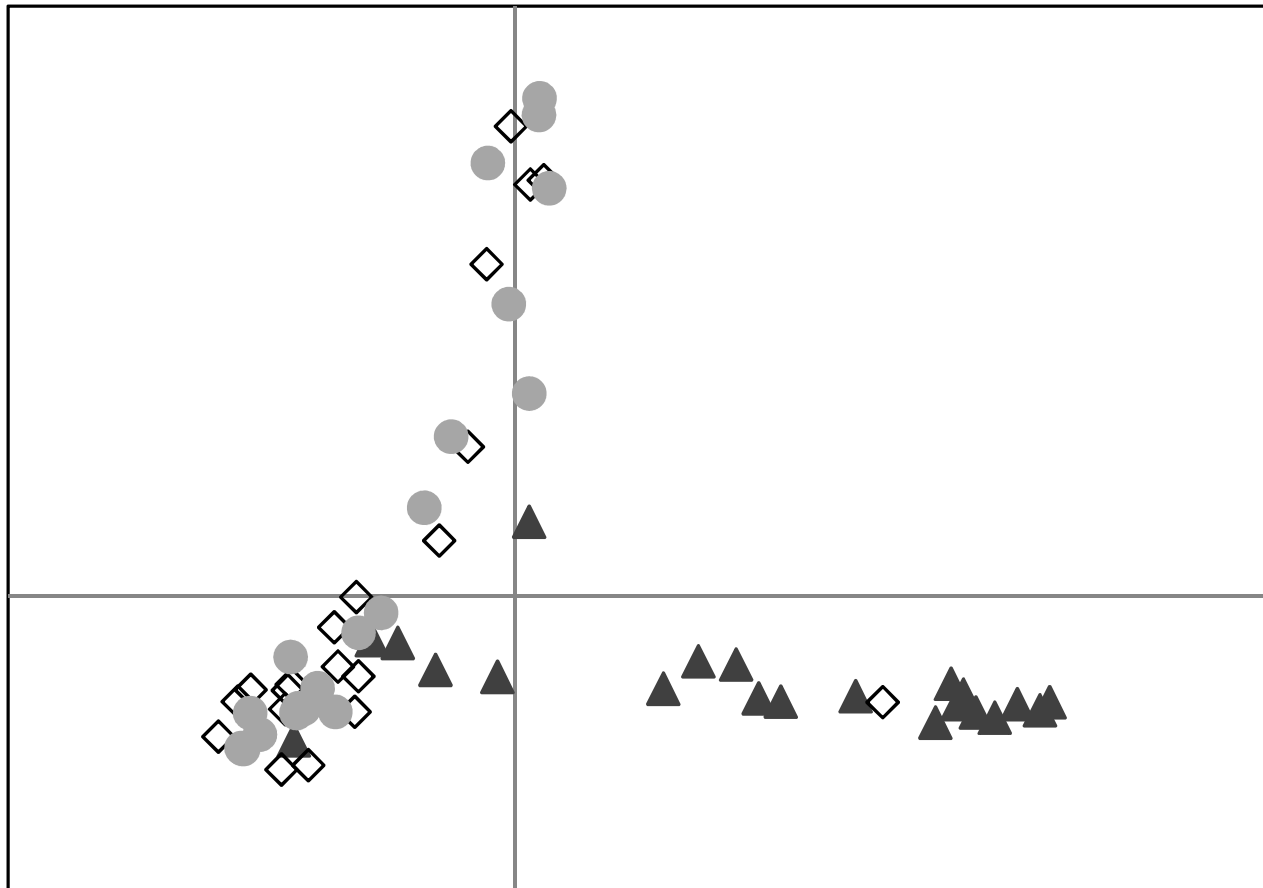

Coord. 1

- ▲ Furnas
- ◇ Fajã de Baixo
- Vila Franca do Campo

Supplement: 41437_2014_BFhdy201384_MOESM14_ESM.pdf [file 41437_2014_BFhdy201384_MOESM14_ESM.pdf]
